# Supplementary material for: Exact simulation of max-stable processes
Source: Oxford University Press journal article supplement (doi:10.1093/biomet/asw008), 2016-05-06
Supplement: asw008_Supplementary_Data.zip [file asw008_Supplementary_Data.zip]

## Supplementary material for ‘Exact simulation of max-stable processes’

BY CLÉMENT DOMBRY

Université de Franche-Comté, Laboratoire de Mathématiques de Besançon, UMR CNRS 6623,  
 16 Route de Gray, 25030 Besançon cedex, France  
 clement.dombry@univ-fcomte.fr

SEBASTIAN ENGELKE

École Polytechnique Fédérale de Lausanne, EPFL-FSB-MATHAA-STAT, Station 8, 1015  
 Lausanne, Switzerland  
 sebastian.engelke@epfl.ch

AND MARCO OESTING

Universität Siegen, Department Mathematik, Walter-Flex-Str. 3, 57068 Siegen, Germany  
 oesting@mathematik.uni-siegen.de

### 1. PROOF OF PROPOSITION 9

*Proof of Proposition 9.* In order to analyze the complexity of Algorithm 1, we consider each step of the algorithm separately. In the  $n$ th step, i.e. for sampling the process perfectly at site  $x_n$ , we simulate Poisson points  $\zeta$  and stochastic processes  $Y$ , until one of the following two conditions is satisfied:

- (a)  $\zeta < Z_{n-1}(x_n)$ . This condition is checked directly after the simulation of  $\zeta$  and, in this case, no stochastic process  $Y$  needs to be simulated.
- (b)  $\zeta > Z_{n-1}(x_n)$  and  $\zeta Y(x_i) \leq Z(x_i)$  for all  $1 \leq i < n - 1$ . In this case,  $Z$  is updated and  $\zeta Y$  is an extremal function as it contributes to  $Z$  at site  $x_n$  (and possibly also at some of the sites  $x_{n+1}, \dots, x_N$ ).

Thus, any stochastic process that is simulated is either rejected, i.e. it is not considered as contribution to  $Z$  as it does not respect all the values  $Z(x_1), \dots, Z(x_{n-1})$ , or it leads to an extremal function. Denoting by  $\Phi^{(n)} = \{(\xi_i^{(n)}, \psi_i^{(n)}), i \geq 1\}$  a Poisson point process on  $(0, \infty) \times \mathcal{C}$  with intensity measure  $\xi^{-2} d\xi P_{x_n}(d\psi)$ , the random number  $C_1(N)$  of processes simulated in Algorithm 1 satisfies

$$C_1(N) = |\Phi_{\{x_1, \dots, x_N\}}^+| + \sum_{n=2}^N \left| \left\{ i \geq 1 : \xi_i^{(n)} > Z(x_n), \xi_i^{(n)} > \min_{j=1}^{n-1} \frac{Z(x_j)}{\psi_i^{(n)}(x_j)} \right\} \right|. \quad (1)$$

In this formula, the term  $|\Phi_{\{x_1, \dots, x_N\}}^+|$  is the number of extremal functions that need to be simulated, and the term with index  $n$  in the sum is the number of functions that are simulated at the  $n$ th step but rejected since  $\xi_i^{(n)} \psi_i^{(n)}(x_j) > Z(x_j)$  for some  $j \leq n - 1$ . For the computation of the expectation of the second term, conditionally on  $\Phi_{\{x_1, \dots, x_{n-1}\}}^+$ , i.e. for fixed  $Z(x_j)$ ,  $1 \leq j \leq n - 1$ ,

the two sets

$$\begin{aligned} \Phi_1^{(n)} &= \{(\xi_i^{(n)}, \psi_i^{(n)}) : \xi_i^{(n)} \psi_i^{(n)}(x_j) > Z(x_j) \text{ for some } j = 1, \dots, n-1\}, \\ \Phi_2^{(n)} &= \{(\xi_i^{(n)}, \psi_i^{(n)}) : \xi_i^{(n)} \psi_i^{(n)}(x_j) \leq Z(x_j) \text{ for all } j = 1, \dots, n-1\} \end{aligned}$$

are restrictions of the Poisson point process  $\Phi^{(n)}$  to disjoint sets and, thus, are independent Poisson point processes with intensities  $\xi^{-2} 1_{\{\xi > \min_{j=1}^{n-1} (Z(x_j)/\psi(x_j))\}} d\xi P_{x_n}(d\psi)$  and  $\xi^{-2} 1_{\{\xi < \min_{j=1}^{n-1} (Z(x_j)/\psi(x_j))\}} d\xi P_{x_n}(d\psi)$ , respectively. Conditioning further on  $\Phi_2^{(n)}$ ,  $Z(x_n)$  is also fixed and we obtain

$$\begin{aligned} & E \left[ \left| \left\{ (\xi_i^{(n)}, \psi_i^{(n)}) : \xi_i^{(n)} > Z(x_n), \xi_i^{(n)} > \min_{j=1}^{n-1} \frac{Z(x_j)}{\psi_i^{(n)}(x_j)} \right\} \right| \right] \\ &= E \left( E \left[ \left| \left\{ (\xi, \psi) \in \Phi_1^{(n)} : \xi > Z(x_n) \right\} \right| \mid \Phi_{\{x_1, \dots, x_{n-1}\}}^+, \Phi_2^{(n)} \right] \right) \\ &= E \left[ \int \int \xi^{-2} 1_{\{\xi > Z(x_n)\}} 1_{\{\xi > \min_{j=1}^{n-1} \frac{Z(x_j)}{\psi(x_j)}\}} d\xi P_{x_n}(d\psi) \right] \\ &= E \left[ \min \left\{ \frac{1}{Z(x_n)}, \max_{j=1}^{n-1} \frac{Y_n(x_j)}{Z(x_j)} \right\} \right] \end{aligned}$$

where  $Y_n \sim P_{x_n}$  and  $Z$  are independent. The relation  $\min\{a, b\} = a + b - \max\{a, b\}$ ,  $a, b \in \mathbb{R}$ , and the fact that  $Y_n(x_n) = 1$  almost surely yield

$$\begin{aligned} & E \left[ \left| \left\{ (\xi_i^{(n)}, \psi_i^{(n)}) : \xi_i^{(n)} > Z(x_n), \xi_i^{(n)} > \min_{j=1}^{n-1} \frac{Z(x_j)}{\psi_i^{(n)}(x_j)} \right\} \right| \right] \\ &= E \left\{ \frac{1}{Z(x_n)} \right\} + E \left\{ \max_{j=1}^{n-1} \frac{Y_n(x_j)}{Z(x_j)} \right\} - E \left\{ \max_{j=1}^n \frac{Y_n(x_j)}{Z(x_j)} \right\} \\ &= 1 + E \left( |\Phi_{\{x_1, \dots, x_{n-1}\}}^+| \right) - E \left( |\Phi_{\{x_1, \dots, x_n\}}^+| \right), \end{aligned}$$

as  $E \left( |\Phi_{\{x_1, \dots, x_n\}}^+| \right) = E \left\{ \max_{j=1}^n Y_n(x_j)/Z(x_j) \right\}$  by Lemma 4.7 in the 2013 technical report by M. Oesting, M. Schlather and C. Zhou (arXiv:1310.1813v1). Thus, by (1), we obtain

$$\begin{aligned} E \{C_1(N)\} &= E \left( |\Phi_{\{x_1, \dots, x_N\}}^+| \right) + \sum_{n=2}^N \left\{ 1 + E \left( |\Phi_{\{x_1, \dots, x_{n-1}\}}^+| \right) - E \left( |\Phi_{\{x_1, \dots, x_n\}}^+| \right) \right\} \\ &= N - 1 + E \left( |\Phi_{\{x_1\}}^+| \right) = N. \end{aligned}$$

Moreover, by (2), we have that  $E\{Z(x_i)^{-1}\} = 1$  for  $i = 1, \dots, N$ , and, thus,

$$E \left\{ \max_{i=1}^N Z(x_i)^{-1} \right\} \geq 1,$$

with equality if and only if  $Z(x_1) = \dots = Z(x_N)$  holds almost surely.  $\square$

## 2. PROOFS FOR SECTION 4

## 2.1. Moving maximum process

50

*Proof of Proposition 3.* In the case of the moving maximum process (12), the measure  $\nu$  associated with the representation (1) is

$$\nu(A) = \int_{\mathcal{X}} 1_{\{h(\cdot - \chi) \in A\}} \lambda(d\chi), \quad A \subset \mathcal{C} \text{ Borel.}$$

We deduce from Proposition 1,

$$\begin{aligned} P_{x_0}(A) &= \int_{\mathcal{C}} 1_{\{f/f(x_0) \in A\}} f(x_0) \nu(df) = \int_{\mathcal{X}} 1_{\{h(\cdot - \chi)/h(x_0 - \chi) \in A\}} h(x_0 - \chi) \lambda(d\chi) \\ &= \int_{\mathcal{X}} 1_{\{h(\cdot + u - x_0)/h(u) \in A\}} h(u) \lambda(du) \end{aligned}$$

where the last line follows from the simple change of variable  $x_0 - \chi = u$ . This proves the result since  $h(u)\lambda(du)$  is a density function on  $\mathcal{X}$ .  $\square$

55

## 2.2. Brown–Resnick process

Our proof of Proposition 4 relies on the following lemma on exponential changes of measures for Gaussian processes. Note that the distribution of  $P_{x_0}$  is strongly connected to the notion of conditional intensity introduced in Dombry et al. (2013) and that the formula are similar.

LEMMA 1. *The distribution of the random process  $(W(x))_{x \in \mathcal{X}}$  under the transformed probability measure  $\widehat{\mathbf{p}}_{\mathbf{r}} = e^{W(x_0) - \sigma^2(x_0)/2} d\mathbf{p}_{\mathbf{r}}$  is equal to the distribution of the Gaussian random process*

60

$$W(x) + K(x_0, x), \quad x \in \mathcal{X},$$

where  $K(x, y)$  denotes the covariance between  $W(x)$  and  $W(y)$ .

*Proof of Lemma 1.* We need to consider finite dimensional distributions only and we compute for some  $x_1, \dots, x_k \in \mathcal{X}$  the Laplace transform of  $(W(x_i))_{1 \leq i \leq k}$  under the transformed probability measure  $\widehat{\mathbf{p}}_{\mathbf{r}}$ . For all  $\theta = (\theta_1, \dots, \theta_k) \in \mathbb{R}^k$ , we have

65

$$\begin{aligned} \mathcal{L}(\theta_1, \dots, \theta_k) &= \widehat{E} \left\{ e^{\sum_{i=1}^k \theta_i W(x_i)} \right\} = E \left\{ e^{W(x_0) - \sigma^2(x_0)/2} e^{\sum_{i=1}^k \theta_i W(x_i)} \right\} \\ &= \exp \left( \frac{1}{2} \tilde{\theta}^T \tilde{\Sigma} \tilde{\theta} - \frac{1}{2} \sigma^2(x_0) \right), \end{aligned} \quad (2)$$

with  $\tilde{\theta} = (1, \theta) \in \mathbb{R}^{k+1}$  and  $\tilde{\Sigma} = (K(x_i, x_j))_{0 \leq i, j \leq k}$  the covariance matrix. We introduce the block decomposition

70

$$\tilde{\Sigma} = \begin{pmatrix} \sigma^2(x_0) & \Sigma_{0,k} \\ \Sigma_{k,0} & \Sigma \end{pmatrix}$$

with  $\Sigma = (K(x_i, x_j))_{1 \leq i, j \leq k}$  and  $\Sigma_{k,0} = \Sigma_{0,k}^T = (K(x_0, x_i))_{1 \leq i \leq k}$ . The quadratic form in Equation (2) can be rewritten as

$$\frac{1}{2} \tilde{\theta}^T \tilde{\Sigma} \tilde{\theta} - \frac{1}{2} \sigma^2(x_0) = \frac{1}{2} \left\{ \sigma^2(x_0) + \theta^T \Sigma \theta + 2\theta^T \Sigma_{k,0} \right\} - \frac{1}{2} \sigma^2(x_0) = \theta^T \Sigma_{k,0} + \frac{1}{2} \theta^T \Sigma \theta.$$

We recognize the Laplace transform of a Gaussian random vector with mean  $\Sigma_{k,0}$  and covariance matrix  $\Sigma$  whence the Lemma follows.  $\square$

75

*Proof of Proposition 4.* Equations (5) and (13) together with Lemma 1 yield, for all Borel set  $A \subset \mathcal{C}$ ,

$$\begin{aligned} P_{x_0}(A) &= \int_{\mathcal{C}} 1_{\{f/f(x) \in A\}} f(x) \nu(df) = E \left[ e^{W(x_0) - \frac{1}{2}\sigma^2(x_0)} 1_{\{e^{W(\cdot) - \frac{1}{2}\sigma^2(\cdot)} / e^{W(x_0) - \frac{1}{2}\sigma^2(x_0)} \in A\}} \right] \\ &= \widehat{\text{pr}} \left( \exp \left[ W(\cdot) - W(x_0) - \frac{1}{2} \{ \sigma^2(\cdot) - \sigma^2(x_0) \} \right] \in A \right) \\ &= \text{pr} \left( \exp \left[ W(\cdot) + K(x_0, \cdot) - W(x_0) - K(x_0, x_0) - \frac{1}{2} \{ \sigma^2(\cdot) - \sigma^2(x_0) \} \right] \in A \right) \\ &= \text{pr} \left( \exp \left[ W(\cdot) - W(x_0) - \frac{1}{2} \{ \sigma^2(\cdot) + \sigma^2(x_0) - 2K(x_0, \cdot) \} \right] \in A \right). \end{aligned}$$

Using the fact that for all  $x \in \mathcal{X}$

$$\sigma^2(x) + \sigma^2(x_0) - 2K(x_0, x) = \text{var}\{W(x) - W(x_0)\}$$

we deduce that  $P_{x_0}$  is equal to the distribution of the log-normal process

$$\tilde{Y}(x) = \exp \left[ W(x) - W(x_0) - \frac{1}{2} \text{var}\{W(x) - W(x_0)\} \right], \quad x \in \mathcal{X}.$$

80 This proves Proposition 4. □

### 2.3. Extremal- $t$ process

It is worth noting that the formula for  $P_{x_0}$  provided in Proposition 5 is similar to the formula for the conditional intensity of the extremal- $t$  process that was computed in Ribatet (2013). In the sequel, we write shortly  $z_+^\alpha = \max(0, z)^\alpha$  for all real numbers  $z$ .

85 **LEMMA 2.** *The distribution of the random process  $(W(x)/W(x_0))_{x \in \mathcal{X}}$  under the transformed probability measure  $\widehat{\text{pr}} = c_\alpha W(x_0)_+^\alpha \text{dpr}$  is equal to the distribution of a Student process with  $\alpha + 1$  degrees of freedom, location parameter  $\mu_k$  and scale matrix  $\widehat{\Sigma}_k$  given by*

$$\mu_k = \Sigma_{k,0}, \quad \widehat{\Sigma}_k = \frac{\Sigma_k - \Sigma_{k,0} \Sigma_{0,k}}{\alpha + 1},$$

where  $\Sigma_k = (K(x_i, x_j))_{1 \leq i, j \leq k}$  and  $\Sigma_{k,0} = \Sigma_{0,k}^\text{T} = (K(x_0, x_i))_{1 \leq i \leq k}$ .

90 *Proof of Lemma 2.* We consider finite dimensional distributions only. Let  $k \geq 1$  and  $x_1, \dots, x_k \in \mathcal{X}$ . We first assume that the covariance matrix  $\widetilde{\Sigma} = (K(x_i, x_j))_{0 \leq i, j \leq k}$  is non singular so that  $(W(x_i))_{0 \leq i \leq k}$  has density

$$\tilde{g}(y) = (2\pi)^{-(k+1)/2} \det(\widetilde{\Sigma})^{-1/2} \exp \left( -\frac{1}{2} y^\text{T} \widetilde{\Sigma}^{-1} y \right), \quad y = (y_i)_{0 \leq i \leq k}.$$

Setting  $z = (y_i/y_0)_{1 \leq i \leq k}$ , we have for all Borel sets  $A_1, \dots, A_k \subset \mathbb{R}$

$$\begin{aligned} \widehat{\text{pr}} \left\{ \frac{W(x_i)}{W(x_0)} \in A_i, \quad i = 1, \dots, k \right\} &= \int_{\mathbb{R}^{k+1}} 1_{\{y_i/y_0 \in A_i, \quad i=1, \dots, k\}} c_\alpha(y_0)_+^\alpha \tilde{g}(y) \, dy \\ &= \int_{\mathbb{R}^k} 1_{\{z_i \in A_i, \quad i=1, \dots, k\}} \left\{ \int_0^\infty c_\alpha(y_0)_+^\alpha \tilde{g}(y_0, y_0 z) y_0^k \, dy_0 \right\} \, dz \end{aligned}$$

We deduce that under  $\widehat{\text{pr}}$ , the random vector  $(W(x_i)/W(x_0))_{1 \leq i \leq k}$  has density

$$\begin{aligned} g(z) &= \int_0^\infty c_\alpha y_0^{k+\alpha} \tilde{g}(y_0, y_0 z) dy_0 \\ &= c_\alpha (2\pi)^{-(k+1)/2} \det(\tilde{\Sigma})^{-1/2} \int_0^\infty y_0^{k+\alpha} \exp\left(-\frac{\tilde{z}^T \tilde{\Sigma}^{-1} \tilde{z}}{2} y_0^2\right) dy_0 \end{aligned}$$

with  $\tilde{z} = (1, z)$ . Using the change of variable  $u = \frac{\tilde{z}^T \tilde{\Sigma}^{-1} \tilde{z}}{2} y_0^2$ , we get

$$\begin{aligned} \int_0^\infty y_0^{k+\alpha} \exp\left(-\frac{\tilde{z}^T \tilde{\Sigma}^{-1} \tilde{z}}{2} y_0^2\right) dy_0 &= \frac{1}{2} \left(\frac{\tilde{z}^T \tilde{\Sigma}^{-1} \tilde{z}}{2}\right)^{-\frac{\alpha+k+1}{2}} \int_0^\infty u^{(k+\alpha-1)/2} \exp(-u) du \\ &= \frac{1}{2} \left(\frac{\tilde{z}^T \tilde{\Sigma}^{-1} \tilde{z}}{2}\right)^{-\frac{\alpha+k+1}{2}} \Gamma\left(\frac{k+\alpha+1}{2}\right) \end{aligned}$$

and we obtain after simplification

95

$$g(z) = \pi^{-k/2} \frac{\Gamma\left(\frac{k+\alpha+1}{2}\right)}{\Gamma\left(\frac{\alpha+1}{2}\right)} \det(\tilde{\Sigma})^{-1/2} \left\{ \tilde{z}^T \tilde{\Sigma}^{-1} \tilde{z} \right\}^{-\frac{\alpha+k+1}{2}}.$$

Introducing the block decomposition  $\tilde{\Sigma} = \begin{pmatrix} 1 & \Sigma_{0,k} \\ \Sigma_{k,0} & \Sigma_k \end{pmatrix}$ , the inverse matrix is

$$\tilde{\Sigma}^{-1} = \begin{pmatrix} 1 + \Sigma_{0,k}(\Sigma_k - \Sigma_{k,0}\Sigma_{0,k})^{-1}\Sigma_{k,0} & -\Sigma_{0,k}(\Sigma_k - \Sigma_{k,0}\Sigma_{0,k})^{-1} \\ -(\Sigma_k - \Sigma_{k,0}\Sigma_{0,k})^{-1}\Sigma_{k,0} & (\Sigma_k - \Sigma_{k,0}\Sigma_{0,k})^{-1} \end{pmatrix}.$$

By the definition of  $\mu_k$  and  $\widehat{\Sigma}_k$ , we have

$$\tilde{\Sigma}^{-1} = \frac{1}{1+\alpha} \begin{pmatrix} 1 + \alpha + \mu_k^T \widehat{\Sigma}_k^{-1} \mu_k & -\mu_k^T \widehat{\Sigma}_k^{-1} \\ -\widehat{\Sigma}_k^{-1} \mu_k & \widehat{\Sigma}_k^{-1} \end{pmatrix}$$

and

$$\tilde{z}^T \tilde{\Sigma}^{-1} \tilde{z} = (1, z)^T \tilde{\Sigma}^{-1} (1, z) = 1 + \frac{(z - \mu_k)^T \widehat{\Sigma}_k^{-1} (z - \mu_k)}{\alpha + 1}$$

Finally, we obtain after simplification

$$g(z) = \pi^{-k/2} (\alpha + 1)^{-k/2} \frac{\Gamma\left(\frac{k+\alpha+1}{2}\right)}{\Gamma\left(\frac{\alpha+1}{2}\right)} \det(\widehat{\Sigma}_k)^{-1/2} \left\{ 1 + \frac{(z - \mu_k)^T \widehat{\Sigma}_k^{-1} (z - \mu_k)}{\alpha + 1} \right\}^{-\frac{\alpha+k+1}{2}}.$$

We recognize the  $k$ -variate Student density with  $\alpha + 1$  degrees of freedom, location parameter  $\mu_k$  and scale matrix  $\widehat{\Sigma}_k$ . □

100

*Proof of Proposition 5.* Consider the set

$$A = \{f \in \mathcal{C}_0 : f(x_1) \in A_1, \dots, f(x_k) \in A_k\}.$$

Equations (5) and (14) together with Lemma 2 yield

$$\begin{aligned} P_{x_0}(A) &= \int_{\mathcal{C}} 1_{\{f/f(x) \in A\}} f(x) \nu(df) = E \left[ c_\alpha W(x_0)_+^\alpha 1_{\{W(x_i)_+^\alpha / W(x_0)_+^\alpha \in A_i, i=1, \dots, k\}} \right] \\ &= \widehat{\text{pr}} \{ W(x_i)_+^\alpha / W(x_0)_+^\alpha \in A_i, i = 1, \dots, k \} \\ &= \text{pr} \{ (T_i)_+^\alpha \in A_i, i = 1, \dots, k \} \end{aligned}$$

where  $T = (T_1, \dots, T_k)$  has a multivariate Student distribution with  $\alpha + 1$  degrees of freedom, location parameter  $\mu_k$  and dispersion matrix  $\widehat{\Sigma}_k$ . This proves the result.  $\square$

#### 2.4. Multivariate extreme value distributions

*Proof of Proposition 6.* It is easily shown that the logistic model admits the representation

$$Z = \max_{i \geq 1} \zeta_i F_i$$

where the  $F_i$ 's are independent random vectors with independent Fréchet( $\beta, c_\beta$ )-distributed components. To check this, we compute

$$\begin{aligned} E \left( \max_{j=1}^N \frac{F_j}{z_j} \right) &= \int_0^\infty \text{pr} \left( \max_{j=1}^N \frac{F_j}{z_j} > u \right) du = \int_0^\infty \left\{ 1 - \prod_{j=1}^N \text{pr}(F_j < z_j u) \right\} du \\ &= \int_0^\infty \left\{ 1 - \prod_{j=1}^N e^{-(z_j u / c_\beta)^{-\beta}} \right\} du = \int_0^\infty \left\{ 1 - e^{-u^{-\beta} \sum_{j=1}^N (z_j / c_\beta)^{-\beta}} \right\} du \\ &= \left( \sum_{j=1}^N z_j^{-\beta} \right)^{1/\beta}. \end{aligned}$$

For the computation of the last integral, we recognize the expectation of a Fréchet distribution. Next we use the fact that  $P_{j_0}$  is the distribution of  $F/F_{j_0}$  under the transformed density

$$y_{j_0} \prod_{k=1}^N \frac{\beta}{c_\beta} \left( \frac{y_k}{c_\beta} \right)^{-1-\beta} e^{-(y_k / c_\beta)^{-\beta}}.$$

We recognize a product measure where the  $j$ th margin,  $j \neq j_0$ , has a Fréchet( $\beta, c_\beta$ ) distribution. The  $j_0$ th marginal has density

$$y_{j_0} \frac{\beta}{c_\beta} \left( \frac{y_{j_0}}{c_\beta} \right)^{-1-\beta} e^{-(y_{j_0} / c_\beta)^{-\beta}}$$

and a simple change of variable reveals that this is the density of  $c_\beta Z^{-1/\beta}$  with  $Z \sim \text{Gamma}(1 - 1/\beta, 1)$ .  $\square$

*Proof of Proposition 7.* Similarly to the logistic model, we have the spectral representation

$$Z = \max_{i \geq 1} \zeta_i W_i$$

where the  $W_i$ 's are independent random vectors with independent Weibull( $\theta, c_\theta$ )-distributed components with scale parameter  $c_\theta = \frac{1}{\Gamma(1+1/\theta)}$ . To check this, we compute

120

$$\begin{aligned} E\left(\max_{j=1}^N \frac{W_j}{z_j}\right) &= \int_0^\infty \text{pr}\left(\max_{j=1}^N \frac{W_j}{z_j} > u\right) du = \int_0^\infty \left\{1 - \prod_{j=1}^N \text{pr}(W_j < z_j u)\right\} du \\ &= \int_0^\infty \left[1 - \prod_{j=1}^N \left\{1 - e^{-(z_j u/c_\theta)^\theta}\right\}\right] du = -\sum_J (-1)^{|J|} \int_0^\infty e^{-u^\theta \sum_{j \in J} (z_j/c_\theta)^\theta} du \\ &= -\sum_J (-1)^{|J|} \left\{\sum_{j \in J} (z_j/c_\theta)^\theta\right\}^{-1/\theta} \Gamma(1 + 1/\theta) = -\sum_J (-1)^{|J|} \left(\sum_{j \in J} z_j^\theta\right)^{-1/\theta}. \end{aligned}$$

For the computation of the last integral, we recognize the expectation of a Weibull distribution. As for the logistic model,  $P_{j_0}$  is the distribution of  $W/W_{j_0}$  under the transformed density

125

$$y_{j_0} \prod_{k=1}^N \frac{\theta}{c_\theta} \left(\frac{y_k}{c_\theta}\right)^{\theta-1} e^{-(y_k/c_\theta)^\theta}.$$

We recognize a product measure where the  $j$ th margin,  $j \neq j_0$ , has a Weibull( $\theta, c_\theta$ ) distribution. The  $j_0$ th marginal has density

$$y_{j_0} \frac{\theta}{c_\theta} \left(\frac{y_{j_0}}{c_\theta}\right)^{\theta-1} e^{-(y_{j_0}/c_\theta)^\theta}$$

and a simple change of variable reveals that this is the density of  $c_\theta Z^{1/\theta}$  with  $Z \sim \text{Gamma}(1 + 1/\theta, 1)$ .  $\square$

130

*Proof of Proposition 8.* By definition,  $P_{j_0}$  has the form

$$\begin{aligned} P_{j_0}(A) &= N \sum_{k=1}^m \pi_k \int_{S_{N-1}} y_{j_0} 1_{\{y/y_{j_0} \in A\}} \text{diri}(y \mid \alpha_{1k}, \dots, \alpha_{Nk}) dy \\ &= N \sum_{k=1}^m \hat{\pi}_k \frac{\int_{S_{N-1}} y_{j_0} 1_{\{y/y_{j_0} \in A\}} \text{diri}(y \mid \alpha_{1k}, \dots, \alpha_{Nk}) dy}{\int_{S_{N-1}} y_{j_0} \text{diri}(y \mid \alpha_{1k}, \dots, \alpha_{Nk}) dy}, \quad A \subset (0, \infty)^N. \end{aligned}$$

Thus,  $P_{j_0}$  is given as the mixture  $P_{j_0} = \sum_{k=1}^m N \hat{\pi}_k P_{j_0}^{(k)}$ , where for each  $k = 1, \dots, m$ , the probability measure  $P_{j_0}^{(k)}$  is equal to the distribution of the random vector  $\tilde{Y}^{(k)}/\tilde{Y}_{j_0}^{(k)}$ , and  $\tilde{Y}^{(k)}$  has a transformed density proportional to  $y_{j_0} \prod_{j=1}^N y_j^{\alpha_j-1}$ . We recognize the Dirichlet distribution with parameters  $\tilde{\alpha}_{1k}, \dots, \tilde{\alpha}_{Nk}$  given by

135

$$\tilde{\alpha}_{j_0 k} = \alpha_{j_0 k} + 1 \quad \text{and} \quad \tilde{\alpha}_{jk} = \alpha_{jk} \quad j \neq j_0.$$

It is well known that Dirichlet distributions can be expressed in terms of Gamma distributions. More precisely, we have the stochastic representation

$$\tilde{Y}^{(k)} = \left( G_1^{(k)} / \sum_{j=1}^N G_j^{(k)}, \dots, G_N^{(k)} / \sum_{j=1}^N G_j^{(k)} \right),$$

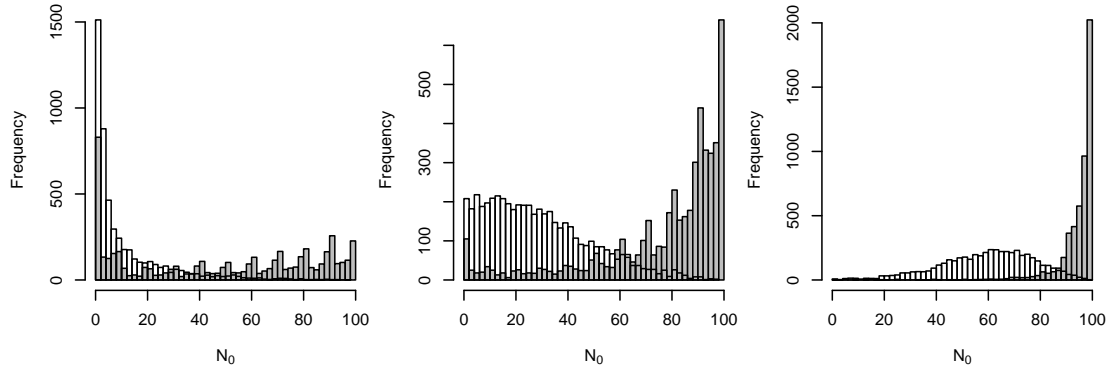

Fig. 1. Histogram of  $N_0$  based on 5000 realizations of a Brown–Resnick process associated to the semi-variogram  $\gamma(h) = c\|h\|^\alpha$  with  $c = 1$  and  $\alpha = 1.5$  (left),  $c = 2.5$  and  $\alpha = 1$  (middle) and  $c = 5$  and  $\alpha = 0.5$  simulated via Algorithm 1 with the deterministic design (grey) and the adaptive design (21) (white), respectively.

where  $G_j^{(k)}$  are independent  $\text{Gamma}(\tilde{\alpha}_{jk}, 1)$  random variables. The result follows since  $P_{j_0}^{(k)}$  is the distribution of  $\tilde{Y}^{(k)}/\tilde{Y}_{j_0}^{(k)}$ .  $\square$

### 3. SIMULATION STUDY

We perform a simulation study to compare the adaptive version of Algorithm 1 introduced in (21) to a version, where the numbering of locations is deterministic. The simulation study is based on 5000 simulations of a Brown–Resnick process associated to a semi-variogram of the type  $\gamma(h) = c\|h\|^\alpha$  on the two-dimensional grid  $\{0.05, 0.15, \dots, 0.95\} \times \{0.05, 0.15, \dots, 0.95\}$ . We run Algorithm 1 with the deterministic design (the grid points are ordered by their coordinates in the lexicographical sense) and with the adaptive design (21). The simulation is repeated for different values of the parameter vector  $(c, \alpha)$  representing strong dependence  $((c, \alpha) = (1, 1.5))$ , moderate dependence  $((c, \alpha) = (2.5, 1))$  and weak dependence  $((c, \alpha) = (5, 0.5))$ . The histograms of  $N_0$  are shown in Figure 1. For each of the three parameter vectors, the number  $N_0$  for the adaptive design is stochastically smaller than the corresponding number for the deterministic design.

### REFERENCES

- DOMBRY, C., ÉYI-MINKO, F. & RIBATET, M. (2013). Conditional simulation of max-stable processes. *Biometrika* **100**, 111–124.
- RIBATET, M. (2013). Spatial extremes: Max-stable processes at work. *Journal de la Société Française de Statistique* **2**, 156–177.
